# Supplementary material for: The climate of the Common Era off the Iberian Peninsula
Source: Copernicus journal article supplement (doi:10.5194/cp-13-1901-2017), 2017-12-21
Supplement: Supplementary file [file cp-13-1901-2017-supplement-title-page.pdf › cp-13-1901-2017-supplement-title-page.pdf]

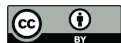

## *Supplement of*

# **The climate of the Common Era off the Iberian Peninsula**

**Fátima Abrantes et al.**

*Correspondence to:* Fátima Abrantes (fatima.abrantes@ipma.pt)

- cp-13-1901-2017-supplement-title-page.pdf
- Abrantes 2ky SM Tables & Figures.docx
- Abrantes 2ky SM no figures.docx

The copyright of individual parts of the supplement might differ from the CC BY 4.0 License.
